# Supplementary material
Source: PubMed Central journal article supplement (PMC7443486)

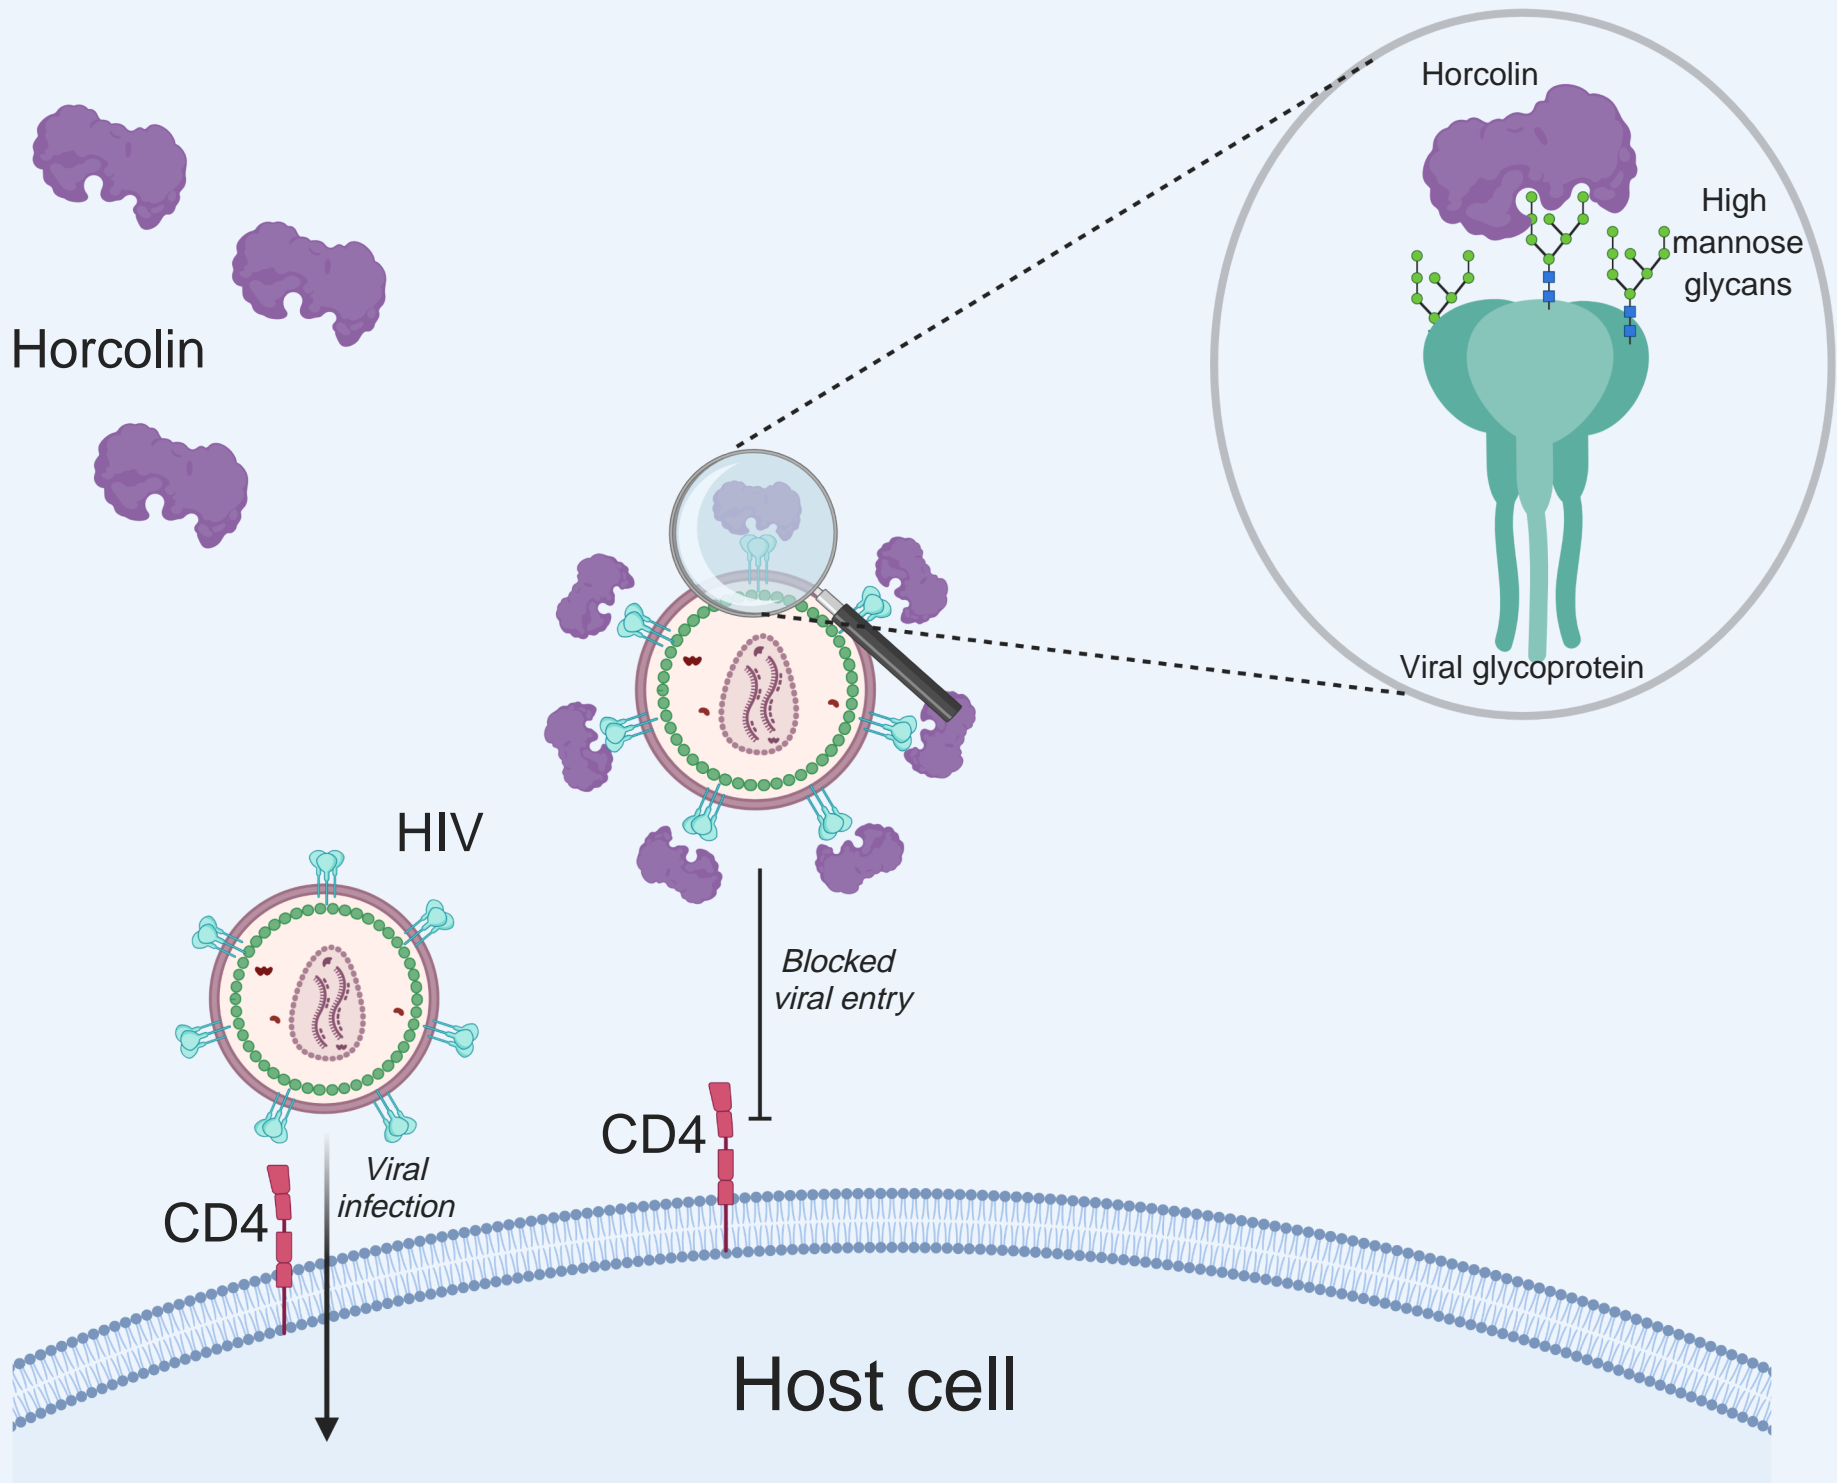

\*\* Not to scale

Supplement: supp_RA120.013100_158920_2_supp_559951_qczn7s.pdf [file supp_RA120.013100_158920_2_supp_559951_qczn7s.pdf]
